# Supplementary material for: Retrospective analysis of antitumor effects and biomarkers for nivolumab in NSCLC patients with EGFR mutations
Source: PLoS One. 2019 Apr 12;14(4):e0215292. doi: 10.1371/journal.pone.0215292 (PMC6461262; doi:10.1371/journal.pone.0215292)
Supplement: S1 File — (XLSX) [file pone.0215292.s001.xlsx]

## Sheet: Sheet1
Individual data of all study patients (n=9).
Case	Age (years)	Sex	Historlogy	Disease stage	Smoking status	Types of EGFR mutation	Prevoius treatmet lines before nivolumab	EGFR-TKIs	PD-L1 expression	No. of CD4+ T cells (/mm2)	N0. of CD8+ T cells (/mm2)	No. of Foxp3+ T cells (/mm2)	PS	NLR	Response to nivolumab	PFS (days)	OS (days)	LDH (U/l)
1	37	F	Adeno	IV	Never	19del. +T790M	5	G→E→A	0	2882	156	44	1	2.4	PD	19	469	188
2	40	M	Adeno	IV	Never	19del.	2	Gefitinib	1	2248	978	8	1	1.96	PD	33	370	232
3	62	F	Adeno	IV	Never	19del.	3	Gefitinib	0	3452	434	22	1	1.96	PD	51	480	197
4	66	F	Adeno	reccurent	Never	20 insertion	4	None	30-40%	5567	1405	874	1	1.51	PR	616	616	214
5	62	F	Adeno	IV	Never	19del.	2	Afatinib	0	951	1117	508	1	2.13	PD	51	355	231
6	72	M	Adeno	IV	Former	19del.	2	Afatinib	0	1548	236	227	1	2.17	PD	47	299	172
7	62	F	Adeno	IV	Never	L858R +T790M	3	Afatinib	5-9%	1502	373	11	0	9.875	NE	31	361	163
8	40	M	Adeno	reccurent	Former	S768I	2	None	0	1942	1186	22	0	4.94	PD	7	44	278
9	62	F	Adeno	IV	Never	19del.	1	Afatinib	1-4%	1407	309	54	1	3.44	PD	31	230	210
F, female; M, male; G, gefitinib; E, erlotinib; A, afatinib; PS, performancde status; NLR, netrophil to lymphocyte ratio; PFS, progression-free survival; OS, overall survival; LDH, lactate dehydrogenase
